# Supplementary material
Source: PubMed Central journal article supplement (PMC4386906)

**SUPPLEMENTAL MATERIAL:****Tables:****Supplementary Table 1: Patient characteristics of the Penn cohort grouped by Peak diuretic efficiency:**

| Characteristic                                        | Diuretic Efficiency |                  | p-value |
|-------------------------------------------------------|---------------------|------------------|---------|
|                                                       | Low (n=329)         | High (n=328)     |         |
| Demographics                                          |                     |                  |         |
| Age (y)                                               | 65.8 ± 15.3         | 61.1 ± 15.3      | <0.001* |
| Black race                                            | 66.5%               | 63.8%            | 0.484   |
| Male                                                  | 47.3%               | 61.9%            | <0.001* |
| Medical History                                       |                     |                  |         |
| Hypertension                                          | 74.7%               | 72.0%            | 0.444   |
| Diabetes                                              | 49.6%               | 38.2%            | 0.004*  |
| Ischemic etiology                                     | 22.9%               | 27.4%            | 0.195   |
| Ejection fraction ≥40%                                | 34.0%               | 32.5%            | 0.692   |
| Admission Physical Exam                               |                     |                  |         |
| Heart rate (beats/min)                                | 90.0 ± 20.3         | 89.1 ± 19.8      | 0.555   |
| Systolic blood pressure (mmHg)                        | 135.1 ± 36.1        | 135.8 ± 31.9     | 0.775   |
| Jugular venous distention (≥ 12 cm water)             | 59.7%               | 61.6%            | 0.697   |
| Edema > 1+                                            | 45.4%               | 47.2%            | 0.665   |
| Hepatojugular reflux                                  | 22.5%               | 22.4%            | 0.989   |
| Cardiac Function                                      |                     |                  |         |
| Ejection fraction (%)                                 | 28 (15, 45)         | 25 (15, 45)      | 0.307   |
| Laboratory Values                                     |                     |                  |         |
| Serum sodium (mEq/L)                                  | 137.8 ± 5.2         | 138.7 ± 4.3      | 0.018*  |
| B-type natriuretic peptide (pg/mL)                    | 1529 (821, 2785)    | 1291 (659, 2348) | 0.007*  |
| eGFR (mL/min/1.73m <sup>2</sup> )                     | 53.3 ± 29.2         | 61.8 ± 26.7      | <0.001* |
| BUN (mg/dL)                                           | 34.3 ± 24.2         | 27.9 ± 21.4      | 0.001*  |
| Hemoglobin (g/dL)                                     | 11.8 ± 2.0          | 12.3 ± 2.1       | 0.010*  |
| Right atrial pressure (mmHg)                          | 11.9 ± 7.1          | 11.2 ± 6.7       | 0.573   |
| Pulmonary capillary wedge pressure (mmHg)             | 23.1 ± 8.2          | 23.9 ± 8.4       | 0.583   |
| Cardiac index (L/min/m <sup>2</sup> )                 | 2.1 ± 0.8           | 2.0 ± 0.5        | 0.387   |
| Systemic vascular resistance (dyn·s/cm <sup>5</sup> ) | 19.0 ± 7.9          | 20.4 ± 7.3       | 0.292   |
| Medications (Admission)                               |                     |                  |         |
| Beta blocker                                          | 67.3%               | 73.8%            | 0.077   |

|                         |              |              |         |
|-------------------------|--------------|--------------|---------|
| ACE inhibitor or ARB    | 55.9%        | 68.4%        | 0.001*  |
| Digoxin                 | 22.0%        | 28.0%        | 0.092   |
| Aldosterone antagonist  | 12.2%        | 20.0%        | 0.011*  |
| Loop diuretic dose (mg) | 80 (0, 160)  | 40 (20, 80)  | 0.033*  |
| Thiazide diuretic       | 16.7%        | 10.2%        | 0.015*  |
| Medications (Discharge) |              |              |         |
| Beta blocker            | 67.3%        | 73.8%        | 0.077   |
| ACE inhibitor or ARB    | 67.7%        | 85.0%        | <0.001* |
| Digoxin                 | 22.5%        | 26.9%        | 0.212   |
| Aldosterone antagonist  | 15.7%        | 27.4%        | 0.001*  |
| Loop diuretic dose (mg) | 80 (40, 160) | 80 (40, 160) | 0.133   |
| Thiazide diuretic       | 14.8%        | 7.1%         | 0.002*  |

eGFR: Estimated glomerular filtration rate, BUN: Blood urea nitrogen, ACE: Angiotensin converting enzyme inhibitor, ARB: Angiotensin receptor blocker. Diuretic efficiency was calculated as the average daily net fluid loss divided by the peak dose of loop diuretic administered in 24 hours (per 40 mg furosemide equivalents). Diuretic efficiency was then dichotomized about the median value in the ESCAPE trial (148 ml/40 mg) to allow direct comparison between cohorts.\* Significant p value.

**Supplementary Table 2: In hospital parameters of the Penn cohort grouped by Peak diuretic efficiency using the cut point from the ESCAPE trial:**

| Characteristic                                                                         | Diuretic Efficiency  |                       | p-value |
|----------------------------------------------------------------------------------------|----------------------|-----------------------|---------|
|                                                                                        | Low (n=329)          | High (n=328)          |         |
| <b>Diuresis Related Parameters</b>                                                     |                      |                       |         |
| Cumulative IV loop diuretic dose (mg)                                                  | 380 (160, 830)       | 240 (120, 495)        | <0.001* |
| Average daily IV loop dose (mg/day)                                                    | 60 (28, 114)         | 50 (24, 87)           | 0.008*  |
| Peak IV loop diuretic dose in 24 hours (mg)                                            | 160 (80, 260)        | 80 (80, 160)          | <0.001* |
| Continuous diuretic infusion                                                           | 9.4%                 | 2.4%                  | <0.001* |
| Adjuvant thiazide diuretic                                                             | 20.1%                | 12.7%                 | 0.011*  |
| Time receiving IV diuretic (% of hospitalization)                                      | 64.9 ± 24.9          | 65.3 ± 24.9           | 0.867   |
| Net fluid loss (L)                                                                     | -1.2 (-5.1, 0.5)     | -5.5 (-9.4, -3.1)     | <0.001* |
| Fluid intake (L)                                                                       | 7.9 (5.1, 13.2)      | 6.3 (4.1, 9.9)        | <0.001* |
| Fluid output (L)                                                                       | 9.7 (5.3, 16.0)      | 12.1 (7.5, 19.6)      | <0.001* |
| Average net daily fluid loss (L)                                                       | 0.2 (0.1, 0.6)       | 1.0 (0.7, 1.5)        | <0.001* |
| Diuretic efficiency (mL fluid output/40mg furosemide equivalents)                      | 122.6 (-79.3, 255.0) | 832.8 (483.1, 1497.3) | <0.001* |
| Estimated peak dose diuretic efficiency (mL fluid output/40 mg furosemide equivalents) | 56.4 (-34.6, 110.1)  | 382.8 (251.1, 638.8)  | <0.001* |
| <b>In-hospital inotropes</b>                                                           |                      |                       |         |
| Milrinone                                                                              | 19.5%                | 12.3%                 | 0.014*  |
| Dobutamine                                                                             | 3.0%                 | 0.2%                  | 0.003*  |
| <b>In-Hospital Maximum Change in Laboratory Parameters</b>                             |                      |                       |         |
| eGFR (%)                                                                               | 19.1 ± 16.2          | 14.0 ± 13.7           | <0.001* |
| Worsening renal function                                                               | 41.4%                | 31.1%                 | 0.007*  |
| Blood urea nitrogen (%)                                                                | -51.8 ± 57.6         | -35.3 ± 45.1          | <0.001* |
| Bicarbonate (%)                                                                        | -21.0 ± 17.7         | -22.6 ± 46.4          | 0.606   |
| <b>Admission to Discharge in Laboratory Parameters</b>                                 |                      |                       |         |
| eGFR (%)                                                                               | -0.8 ± 29.1          | -2.0 ± 24.2           | 0.560   |
| Worsening renal function                                                               | 20.9%                | 13.9%                 | 0.019*  |
| Blood urea nitrogen (%)                                                                | -30.3 ± 56.7         | -18.6 ± 48.3          | 0.007*  |
| Bicarbonate (%)                                                                        | -10.5 ± 18.2         | -13.8 ± 47.5          | 0.299   |
| Sodium (%)                                                                             | 0.9 ± 5.6            | 0.8 ± 3.0             | 0.764   |
| <b>Hospital Course</b>                                                                 |                      |                       |         |
| Length of stay (days)                                                                  | 7 (4, 11)            | 5 (4, 8)              | <0.001* |
| <b>Discharge Physical Examination</b>                                                  |                      |                       |         |

|                                                           |       |       |       |
|-----------------------------------------------------------|-------|-------|-------|
| Jugular venous distention ( $\geq 8$ cm H <sub>2</sub> O) | 19.8% | 20.1% | 0.942 |
| Edema > 1+                                                | 18.1% | 15.1% | 0.318 |
| Hepatojugular reflux                                      | 3.8%  | 3.5%  | 0.898 |

---

eGFR: Estimated glomerular filtration rate. \* Significant p value.

**Supplementary Table 3: Univariate and multivariate associations with mortality in the Penn and ESCAPE cohorts**

| Univariate                               | <u>Penn Cohort</u> |         |                                       |                  |         |
|------------------------------------------|--------------------|---------|---------------------------------------|------------------|---------|
|                                          | HR (95% CI)        | P Value | Final model                           | HR (95% CI)      | P Value |
| Loop diuretic                            | 1.6 (1.3-1.9)      | <0.001  | Loop diuretic                         | 1.2 (0.9-1.6)    | 0.132   |
| Net fluid output                         | 1.0 (0.8-1.2)      | 0.929   | Net fluid output                      | 1.0 (0.7-1.2)    | 0.78    |
| Diuretic efficiency                      | 1.6 (1.3-2.0)      | <0.001  | Diuretic efficiency                   | 1.4 (1.0-1.8)    | 0.023   |
| Age (years)                              | 1.03 (1.02-1.04)   | <0.001  | Age (per 10 years)                    | 1.4 (1.2-1.5)    | <0.001  |
| Heart rate (per 10 BPM)                  | 0.90 (0.86-0.95)   | <0.001  |                                       |                  |         |
| Systolic blood pressure (per 10 mmHg)    | 0.90 (0.87-0.93)   | <0.001  | Systolic blood pressure (per 10 mmHg) | 0.92 (0.88-0.96) | <0.001  |
| Loop dose at baseline (per 100 mg)       | 1.1 (1.05-1.2)     | <0.001  |                                       |                  |         |
| Serum sodium (per 5 meq/l)               | 0.79 (0.71-0.88)   | <0.001  | Serum sodium (per 5 meq/l)            | 0.89 (0.79-1.0)  | 0.071   |
| Hemoglobin (g/dl)                        | 0.89 (0.85-0.94)   | <0.001  |                                       |                  |         |
| Log B-type natriuretic peptide (pg/ml)   | 1.8 (1.3-2.4)      | <0.001  |                                       |                  |         |
| eGFR (per 10 ml/min/1.73m <sup>2</sup> ) | 0.89 (0.85-0.92)   | <0.001  |                                       |                  |         |
| Blood urea nitrogen (per 10 mg/dl)       | 1.2 (1.2-1.2)      | <0.001  | Blood urea nitrogen (per 10 mg/dl)    | 1.1 (1.1-1.2)    | <0.001  |
| Black race                               | 0.79 (0.64-0.98)   | 0.034   | Race                                  | 1.3 (1.0-1.7)    | 0.043   |
| Diabetes                                 | 1.2 (0.97-1.5)     | 0.093   |                                       |                  |         |
| Ischemic etiology for HF                 | 1.4 (1.1-1.8)      | 0.002   |                                       |                  |         |
| Baseline edema                           | 1.4 (1.1-1.7)      | 0.004   |                                       |                  |         |
| Baseline digoxin use                     | 1.4 (1.1-1.7)      | 0.008   | Digoxin use                           | 1.4 (1.1-1.8)    | 0.011   |
| Baseline thiazide diuretic use           | 1.5 (1.1-2.0)      | 0.01    | Thiazide diuretic use                 | 1.3 (0.92-1.7)   | 0.143   |

**ESCAPE Cohort**

| <b>Univariate</b>                        | <b>HR (95% CI)</b> | <b>P Value</b> | <b>Final model</b>                 | <b>HR (95% CI)</b> | <b>P Value</b> |
|------------------------------------------|--------------------|----------------|------------------------------------|--------------------|----------------|
| Loop diuretic                            | 2.5 (1.5-3.9)      | <0.001         | Loop diuretic                      | 1.3 (0.7-2.4)      | 0.366          |
| Net fluid output                         | 1.0 (0.6-1.5)      | 0.86           | Net fluid output                   | 1.2 (0.7-2.1)      | 0.59           |
| Diuretic efficiency                      | 4.0 (2.3-6.8)      | <0.001         | Diuretic efficiency                | 2.9 (1.5-5.4)      | 0.001          |
| Age (per 10 years)                       | 1.3 (1.1- 1.5)     | 0.012          | Age (per 10 years)                 | 1.2 (0.94-1.5)     | 0.158          |
| Systolic blood pressure (per 10 mmHg)    | 0.88 (0.76-1.0)    | 0.08           |                                    |                    |                |
| Loop dose at baseline (per 100 mg)       | 1.2 (1.1-1.3)      | <0.001         | Loop dose at baseline (per 100 mg) | 1.2 (1.0-1.3)      | 0.018          |
| Serum sodium (per 5 meq/l)               | 0.67 (0.54-0.83)   | <0.001         | Serum sodium (per 5 meq/l)         | 0.80 (0.62-1.00)   | 0.096          |
| Hemoglobin (per 1 g/dl)                  | 1.04 (1.00-1.08)   | 0.043          | Hemoglobin (per 1 g/dl)            | 1.04 (1.00-1.07)   | 0.041          |
| eGFR (per 10 ml/min/1.73m <sup>2</sup> ) | 0.79 (0.70-0.88)   | <0.001         |                                    |                    |                |
| Blood urea nitrogen (per 10 mg/dl)       | 1.3 (1.2-1.4)      | <0.001         | Blood urea nitrogen (per 10 mg/dl) | 1.2 (1.1-1.3)      | <0.001         |
| Hypertension                             | 0.70 (0.44-1.1)    | 0.124          | Hypertension                       | 0.58 (0.34-0.98)   | 0.043          |
| Ischemic etiology for HF                 | 2.1 (1.3-3.4)      | 0.003          | Ischemic etiology for HF           | 1.54 (0.86-2.7)    | 0.143          |
| Baseline beta blocker                    | 0.67 (0.42-1.0)    | 0.079          | Baseline beta blocker              | 0.60 (0.36-0.99)   | 0.046          |
| Baseline ACE or ARB                      | 0.43 (0.24-0.78)   | 0.006          |                                    |                    |                |
| Baseline thiazide diuretic use           | 1.9 (1.1-3.3)      | 0.027          |                                    |                    |                |
| Baseline jugular venous distension       | 1.5 (0.9-2.4)      | 0.088          |                                    |                    |                |
| Baseline edema                           | 1.9 (1.2-3.0)      | 0.006          |                                    |                    |                |

**Supplementary Table 4: Association between diuretic efficiency and mortality in patients with and without preserved ejection fraction in the Penn cohort.**

---

| <b>Patients with:</b>            | <b>HR (95% CI)</b> | <b>p Value</b> | <b>p interaction</b> |
|----------------------------------|--------------------|----------------|----------------------|
| <b>Ejection Fraction &lt;40%</b> | 1.8 (1.4-2.4)      | <0.001*        |                      |
| <b>Ejection Fraction ≥40%</b>    | 1.4 (1.0-2.0)      | 0.074          | 0.245                |
| <b>Ejection Fraction &lt;50%</b> | 1.8 (1.4-2.3)      | <0.001*        |                      |
| <b>Ejection Fraction ≥50%</b>    | 1.3 (0.9-2.1)      | 0.209          | 0.255                |

---

HR: Hazard ratio, CI: Confidence interval. Hazard ratios represent cumulative diuretic efficiencies below compared to above the median value.

**Figures:**

**Supplementary Figure 1: Consort diagram for the Penn Cohort**

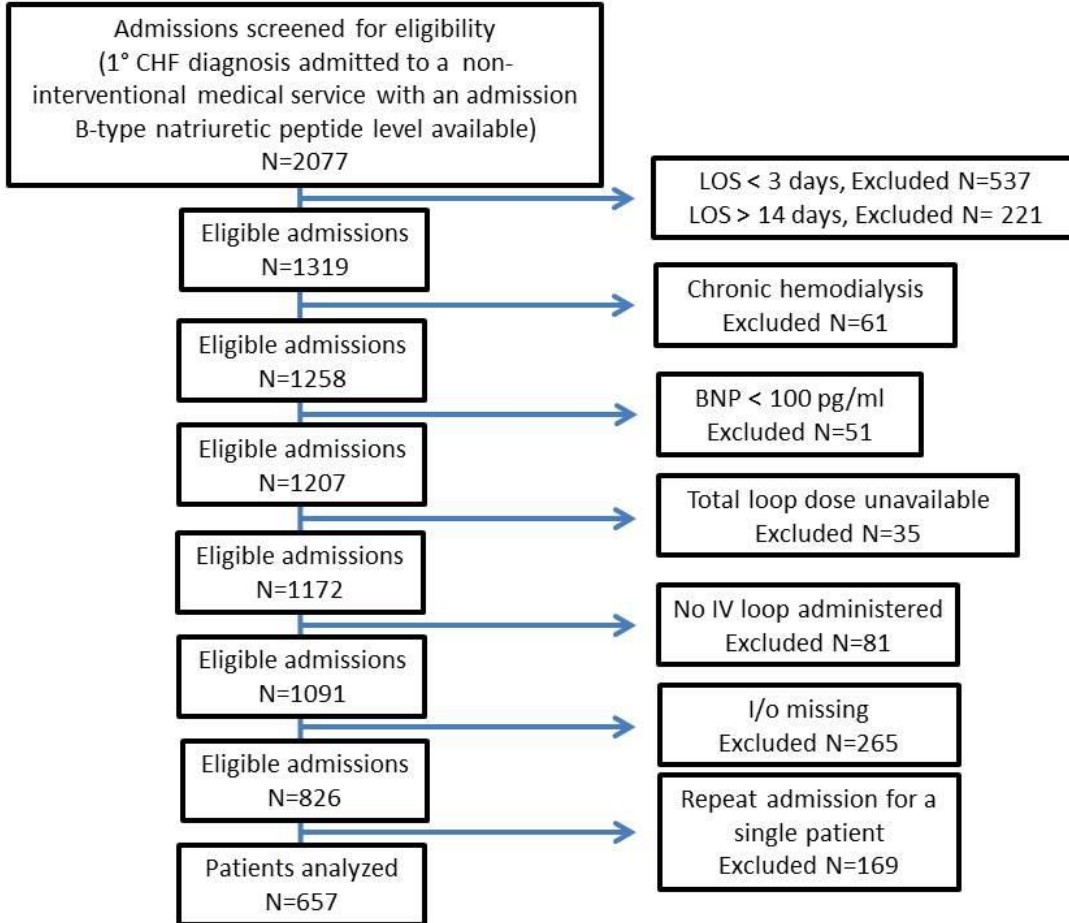



Supplementary Figure 2: Scatterplots of diuretic efficiency, loop diuretic dose, and net fluid output in the Penn (Panel A) and ESCAPE cohorts (Panel B)

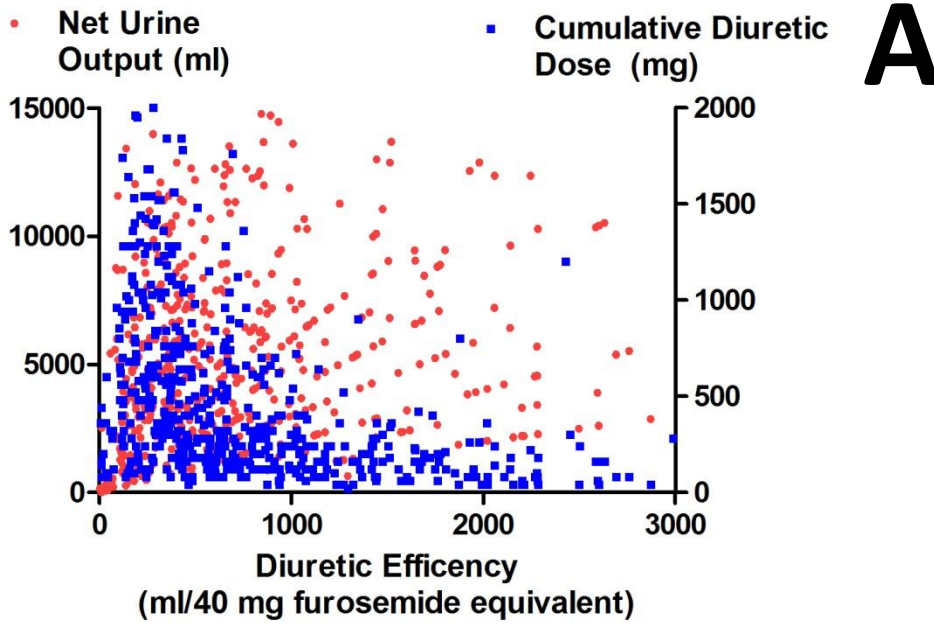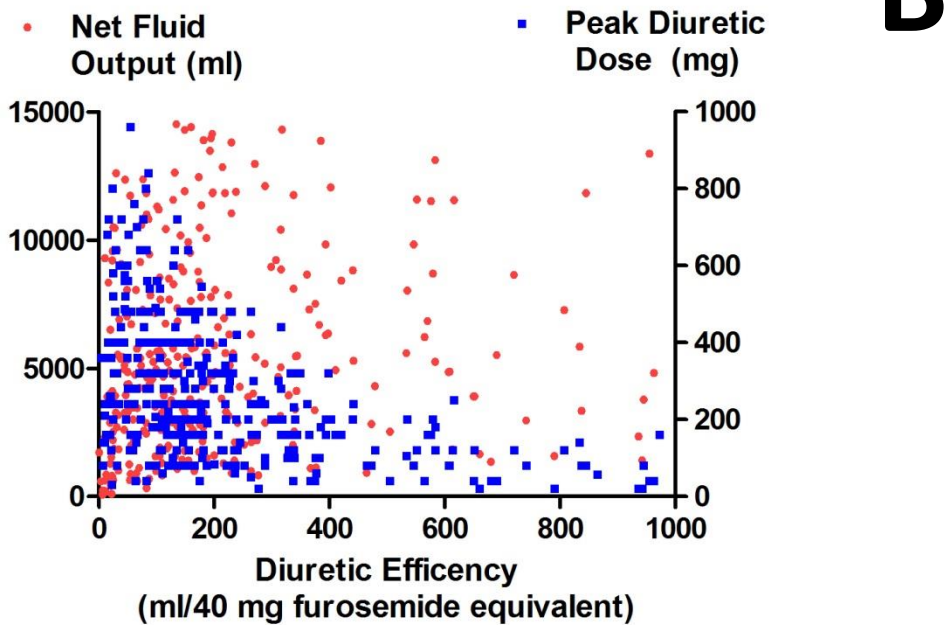

Supplementary Figure 3: Scatterplots of loop diuretic dose and net fluid output in the Penn (Panel A) and ESCAPE cohorts (Panel B)

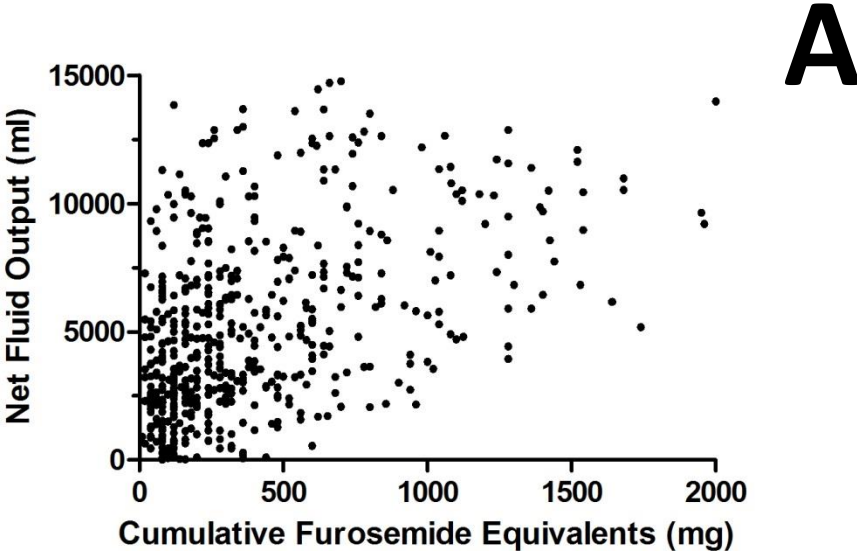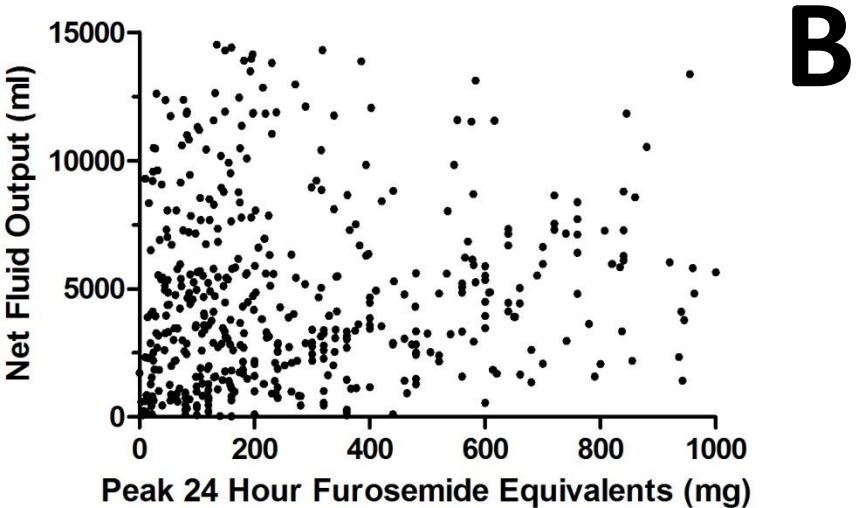

**Supplementary Figure 4: Kaplan-Meier survival curves grouped by quartiles of diuretic efficiency in the Penn cohort (Panel A) and ESCAPE cohort (Panel B)**

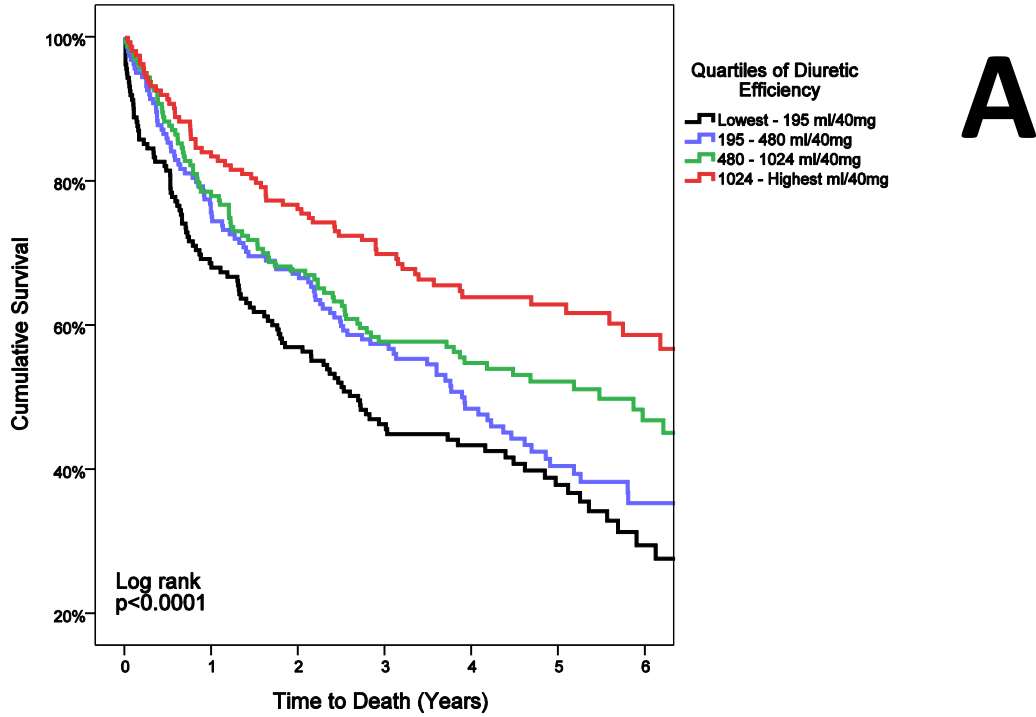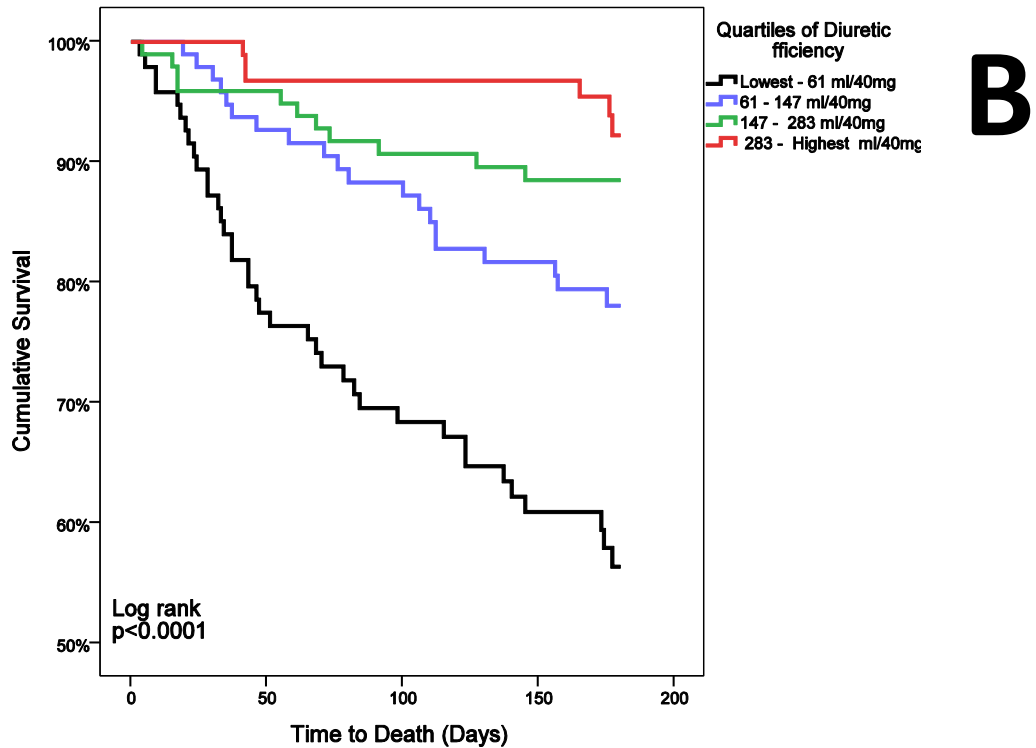

Supplement: NIHMS675247-supplement-1.pdf [file NIHMS675247-supplement-1.pdf]
